# Supplementary material for: Quality of Nursing Homes Admitting Working-Age Adults With Serious Mental Illness
Source: Atypon-hosted journal article supplement (doi:10.1176/appi.ps.202100356), 2021-12-16
Supplement: appi.ps.202100356.ds001.pdf [file appi.ps.202100356.ds001.pdf]

Supplementary Figure. Eligibility criteria

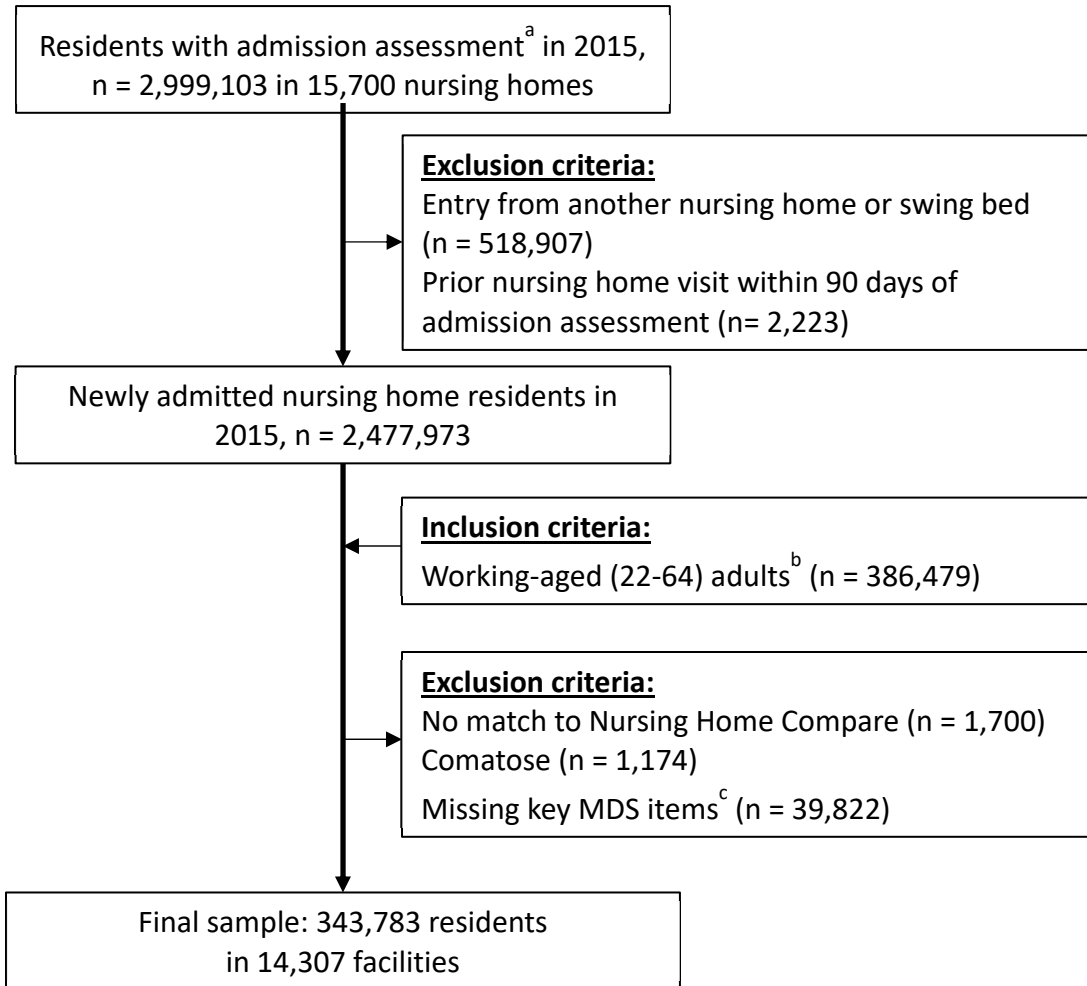

<sup>a</sup> Admission assessment defined by type of entry (A1700 = 1) and Federal OBRA reason for assessment (A0310A = 01)

<sup>b</sup> Random new admission assessment selected for those with duplicates (n = 93,813 assessments)

<sup>c</sup> key MDS items: health inspection star rating, SMI diagnosis, age, sex, race/ethnicity, and marital status

Supplemental Table. Estimates for logistic mixed effects model of serious mental illness in working age adults admitted to U.S. nursing homes in 2015

|                                                                                              | <b>Adjusted<br/>odds ratio</b> | <b>95% Confidence<br/>Interval</b> |
|----------------------------------------------------------------------------------------------|--------------------------------|------------------------------------|
| <i>Level 1 effects</i>                                                                       |                                |                                    |
| <i>Sociodemographic covariates</i>                                                           |                                |                                    |
| <b>Age in years</b>                                                                          |                                |                                    |
| 22-34                                                                                        |                                | reference                          |
| 35-44                                                                                        | 1.18                           | 1.10-1.26                          |
| 45-54                                                                                        | 1.11                           | 1.05-1.18                          |
| 55-64                                                                                        | 0.98                           | 0.93-1.04                          |
| <b>Sex</b>                                                                                   |                                |                                    |
| Female                                                                                       | 1.23                           | 1.21-1.26                          |
| <b>Race/ethnicity</b>                                                                        |                                |                                    |
| Non-Hispanic White                                                                           |                                | reference                          |
| Non-Hispanic Black                                                                           | 0.78                           | 0.76-0.81                          |
| Hispanic                                                                                     | 0.65                           | 0.62-0.69                          |
| American Indian, Alaska Native, Asian, Native<br>Hawaiian, Pacific Islander, or Multi-racial | 0.62                           | 0.57-0.67                          |
| <b>Marital status</b>                                                                        |                                |                                    |
| Never married                                                                                |                                | reference                          |
| Married                                                                                      | 0.46                           | 0.44-0.47                          |
| Widowed                                                                                      | 0.60                           | 0.57-0.63                          |
| Divorced/separated                                                                           | 0.74                           | 0.73-0.77                          |
| <b>Admitted from</b>                                                                         |                                |                                    |
| Community                                                                                    |                                | reference                          |
| Acute hospital                                                                               | 0.86                           | 0.82-0.90                          |
| Psychiatric hospital                                                                         | 9.05                           | 8.26-9.92                          |
| Other                                                                                        | 0.63                           | 0.57-0.70                          |
| <i>Functional covariates</i>                                                                 |                                |                                    |
| <b>Physical function</b>                                                                     |                                |                                    |
| Independent/ limited assistance required for ADLs                                            |                                | reference                          |
| Extensive assistance required for ADLs                                                       | 0.79                           | 0.77-0.81                          |
| Dependent/total dependence for ADLs                                                          | 0.54                           | 0.53-0.56                          |
| <b>Cognitive function</b>                                                                    |                                |                                    |
| Intact                                                                                       |                                | reference                          |
| Mild impairments                                                                             | 1.71                           | 1.66-1.76                          |
| Moderate impairments                                                                         | 2.15                           | 2.07-2.24                          |
| Severe impairments                                                                           | 1.54                           | 1.44-1.63                          |

*Clinical covariates*

**Comorbidities**

|                  |      |           |
|------------------|------|-----------|
| Hypertension     | 0.97 | 0.94-0.99 |
| Cardiovascular   | 0.81 | 0.79-0.83 |
| Diabetes         | 1.04 | 1.02-1.07 |
| Gastrointestinal | 1.12 | 1.10-1.15 |
| Pulmonary        | 1.41 | 1.37-1.44 |
| Musculoskeletal  | 0.97 | 0.95-1.00 |
| Genitourinary    | 0.91 | 0.89-0.94 |
| Infection        | 1.01 | 0.99-1.04 |
| Cancer           | 0.66 | 0.63-0.69 |
| Malnutrition     | 0.80 | 0.75-0.85 |

**Psychiatric comorbidities**

|                                |      |           |
|--------------------------------|------|-----------|
| Depression                     | 1.19 | 1.17-1.22 |
| Anxiety disorder               | 1.73 | 1.69-1.78 |
| Post-traumatic stress disorder | 2.85 | 2.65-3.06 |

*Level 2 effects*

**Ownership**

|                  |      |           |
|------------------|------|-----------|
| For-profit       |      | reference |
| Government-owned | 0.87 | 0.79-0.95 |
| Nonprofit        | 0.73 | 0.69-0.76 |

**Urbanicity**

|       |      |           |
|-------|------|-----------|
| Urban | 1.01 | 0.96-1.06 |
| Rural |      | reference |

**Certified beds**

|                               |      |           |
|-------------------------------|------|-----------|
| Quartile 1 (low): < 63 beds   |      | reference |
| Quartile 2: 63 to < 100 beds  | 1.10 | 1.03-1.17 |
| Quartile 3: 100 to < 128 beds | 1.05 | 0.98-1.11 |
| Quartile 4 (high): ≥ 128 beds | 1.17 | 1.10-1.25 |

**Nursing Home Quality**

|                      |      |           |
|----------------------|------|-----------|
| 1-star survey rating |      | reference |
| 2-star survey rating | 0.95 | 0.91-0.99 |
| 3-star survey rating | 0.90 | 0.86-0.94 |
| 4-star survey rating | 0.85 | 0.81-0.89 |
| 5-star survey rating | 0.78 | 0.73-0.84 |

---

Note: ICC=0.1105. Values based on SAS PROC GLMIMMIX; Estimation method: Laplace.  
Models adjusted for state and all covariates listed in Tables 1 and 2 (other than dementia and neurological conditions).

## Appendix A. Item numbers

| Variable name                                   | MDS item number                                                                                                                    |
|-------------------------------------------------|------------------------------------------------------------------------------------------------------------------------------------|
| <i>Minimum Data Set</i>                         |                                                                                                                                    |
| Type of entry                                   | A1700_ENTRY_TYPE_CD                                                                                                                |
| Federal OBRA reason for assessment              | A03310A_Fed_OBRA_Cd                                                                                                                |
| Entered from                                    | A1800_Entrd_From_Txt                                                                                                               |
| Entry date                                      | A1600_Entry_Date                                                                                                                   |
| CMS certification number                        | A0100B_CMS_CRTFCTN_NUM                                                                                                             |
| Comatose                                        | B0100_CMTS                                                                                                                         |
| Manic depression                                | I5900_MNC_DPRSN                                                                                                                    |
| Schizophrenia                                   | I6000_SCHZOPRNIA                                                                                                                   |
| Psychotic disorder                              | I5950_PSYCHTC                                                                                                                      |
| Additional active diagnosis                     | I8000A_ICD_1 - I8000J_ICD_10                                                                                                       |
| Resident age (calculated)                       | C_Rsdnt_Age_Num                                                                                                                    |
| Sex                                             | A0800_GNDR                                                                                                                         |
| Race/ ethnicity                                 | A100: Race/Ethnicity                                                                                                               |
| Marital status                                  | A1200_MRTL_STUS                                                                                                                    |
| Urbanicity                                      | C_URBN_RRL                                                                                                                         |
| Admission from                                  | A1800_ENTRD_FROM                                                                                                                   |
| Dual Eligibility                                | bene_ID                                                                                                                            |
| Cognitive Function Scale                        | C0500_BIMS_Scre_Num                                                                                                                |
| Activities of Daily living                      | G0110J1_PRSNL_HYGNE_SELF<br>G0110I1_TOILTG_SELF<br>G0110E1_LOCOMTN_ON_SELF<br>G0110H1_EATG_SELF                                    |
| Dementia/ Alzheimer's                           | I4200_ALZHMR_CD<br>I4800_DMNT_CD                                                                                                   |
| Diabetes                                        | I2900_DM_CD                                                                                                                        |
| Hypertension                                    | I0700_HYPRTNSN_CD                                                                                                                  |
| Any cardiovascular<br>(other than hypertension) | I0200_ANEMIA_CD<br>I0300_DYSRHYTHMIA_CD<br>I0400_CAD_CD<br>I0500_DVT_CD<br>I0600_HRT_FAILR_CD<br>I0800_HYPOTNSN_CD<br>I0900_PVD_CD |

|                                                       |                                                                                                                                                                                                                                     |
|-------------------------------------------------------|-------------------------------------------------------------------------------------------------------------------------------------------------------------------------------------------------------------------------------------|
| Any musculoskeletal                                   | I3700_ARTHTS_CD<br>I3800_OSTPRS_CD<br>I3900_HIP_FRCTR_CD<br>I4000_OTHR_FRCTR_CD                                                                                                                                                     |
| Any neurological<br>(other than dementia/Alzheimer's) | I4300_APHASIA_CD<br>I4400_CRBRL_PLSY_CD<br>I4500_STRK_CD<br>I4900_HEMIPLG_CD<br>I5000_PARAPLG_CD<br>I5100_QUADPLG_CD<br>I5200_MS_CD<br>I5250_HNTGTN_CD<br>I5300_PRKNSN_CD<br>I5350_TOURT_CD<br>I5400_SZRE_CD<br>I5500_BRN_INJURY_CD |
| Any pulmonary                                         | I6200_ASTHMA_CD<br>I6300_RSPRTRY_FAILR_CD                                                                                                                                                                                           |
| Any cancer                                            | 0100_CNCR_CD                                                                                                                                                                                                                        |
| Any gastrointestinal                                  | I1100_CRRHS_CD<br>I1200_GERD_CD<br>I1300_ULCRTV_CLTS_CD                                                                                                                                                                             |
| Any genitourinary                                     | I1400_BPH_CD<br>I1500_ESRD_CD<br>I1550_NRGNC_BLADR_CD<br>I1650_OBSTRCT_URPTHY_CD                                                                                                                                                    |
| Any infection                                         | I1700_MDRO_CD<br>I2000_PNEUMO_CD<br>I2100_SPTCMIA_CD<br>I2200_TB_CD<br>I2300_UTI_CD<br>I2400_VRL_HPT_CD<br>I2500_WND_INFCTN_CD                                                                                                      |
| Malnutrition                                          | I5600_MALNTRTN_CD                                                                                                                                                                                                                   |
| Depression                                            | I5800_DPRSN_CD                                                                                                                                                                                                                      |
| Anxiety                                               | I5700_ANXTY_DSORDR_CD                                                                                                                                                                                                               |
| Post-traumatic stress disorder                        | I6100_PTSD_CD                                                                                                                                                                                                                       |

| <i>Nursing Home Compare</i> |                    |
|-----------------------------|--------------------|
| Provider number             | provnum            |
| File Date                   | filedate           |
| Health inspection           | survey_rating      |
| Overall composite           | overall_rating     |
| Quality rating              | quality_rating     |
| Staffing rating             | staffing_rating    |
| RN staffing                 | RN_staffing_rating |
| location (state)            | state              |
| ownership type              | ownership          |
| number of certified beds    | bedcert            |

### Appendix B. ICD Codes

| Diagnosis                                                 | ICD-9 code                    | ICD-10 code                  |
|-----------------------------------------------------------|-------------------------------|------------------------------|
| <b>Schizophrenia-related</b>                              |                               |                              |
| Schizophrenia                                             | 295.00 - 295.95               | F20.0 - F20.9                |
| Schizoaffective                                           | included above                | F25.0, F25.1<br>F25.8, F25.9 |
| Schizophreniform                                          | included above                | included above               |
| <b>Manic Depression</b>                                   | 296.0, 296.1<br>296.4 - 296.8 | F31.0-F31.9                  |
| <b>Psychotic disorders</b>                                |                               |                              |
| Brief psychotic disorder                                  | 298.3, 298.4<br>298.8         | F23                          |
| Delusional disorder                                       | 297.1                         | F22                          |
| Major depressive disorder<br>(severe, psychotic features) | 298.0                         | F32.3<br>F33.3               |
| Others                                                    | 298.1<br>298.9                | F28<br>F29                   |
